# Supplementary material for: Arctic cloud annual cycle biases in climate models
Source: Copernicus journal article supplement (doi:10.5194/acp-19-8759-2019), 2019-07-10
Supplement: Supplementary file 1 [file acp-19-8759-2019-supplement.pdf]

Supplement of Atmos. Chem. Phys., 19, 8759–8782, 2019  
<https://doi.org/10.5194/acp-19-8759-2019-supplement>  
© Author(s) 2019. This work is distributed under  
the Creative Commons Attribution 4.0 License.

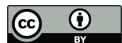

*Supplement of*

## **Arctic cloud annual cycle biases in climate models**

**Patrick C. Taylor et al.**

*Correspondence to:* Patrick C. Taylor ([patrick.c.taylor@nasa.gov](mailto:patrick.c.taylor@nasa.gov))

The copyright of individual parts of the supplement might differ from the CC BY 4.0 License.

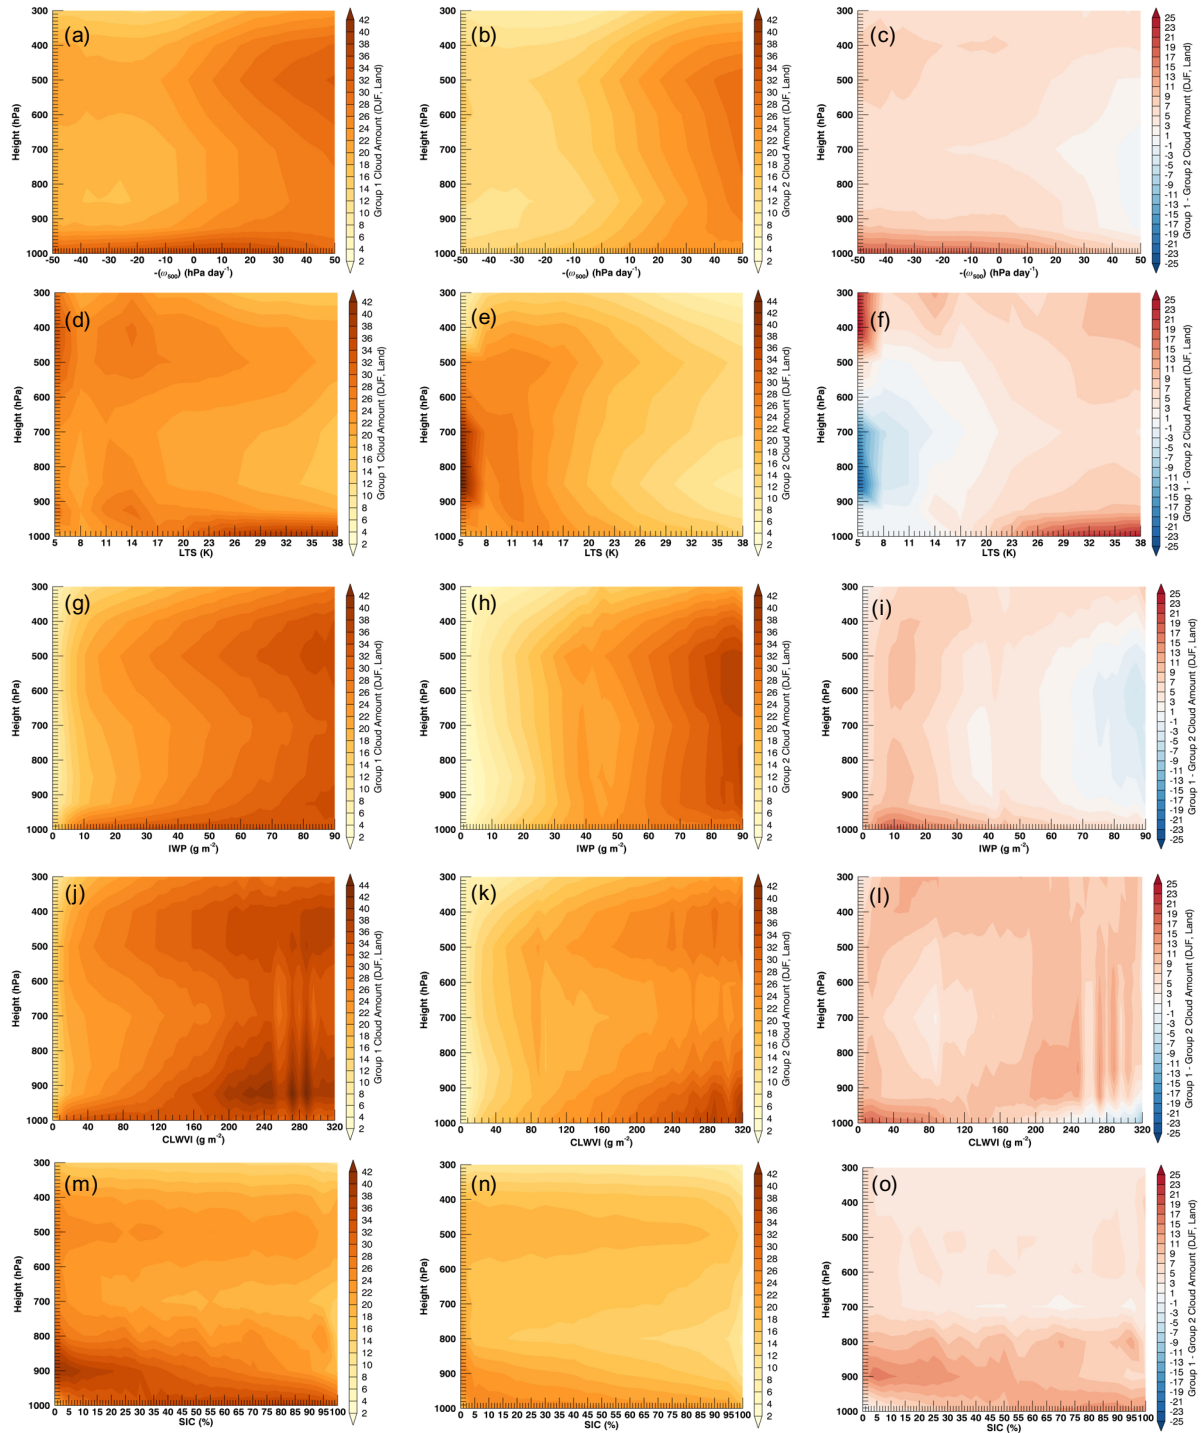

**Figure S1: Vertically-resolved, DJF average cloud amount stratified by  $-\omega_{sm}$  for (a) Group 1, (b) Group 2, and (c) Group 1 minus Group 2, LTS for (d) Group 1, (e) Group 2, and (f) Group 1 minus Group 2, IWP for (g) Group 1, (h) Group 2, and (i) Group 1 minus Group 2; CLWVI for (j) Group 1, (k) Group 2, and (l) Group 1 minus Group 2, and SIC for (m) Group 1, (n) Group 2, and (o) Group 1 minus Group 2. All panels are for land.**

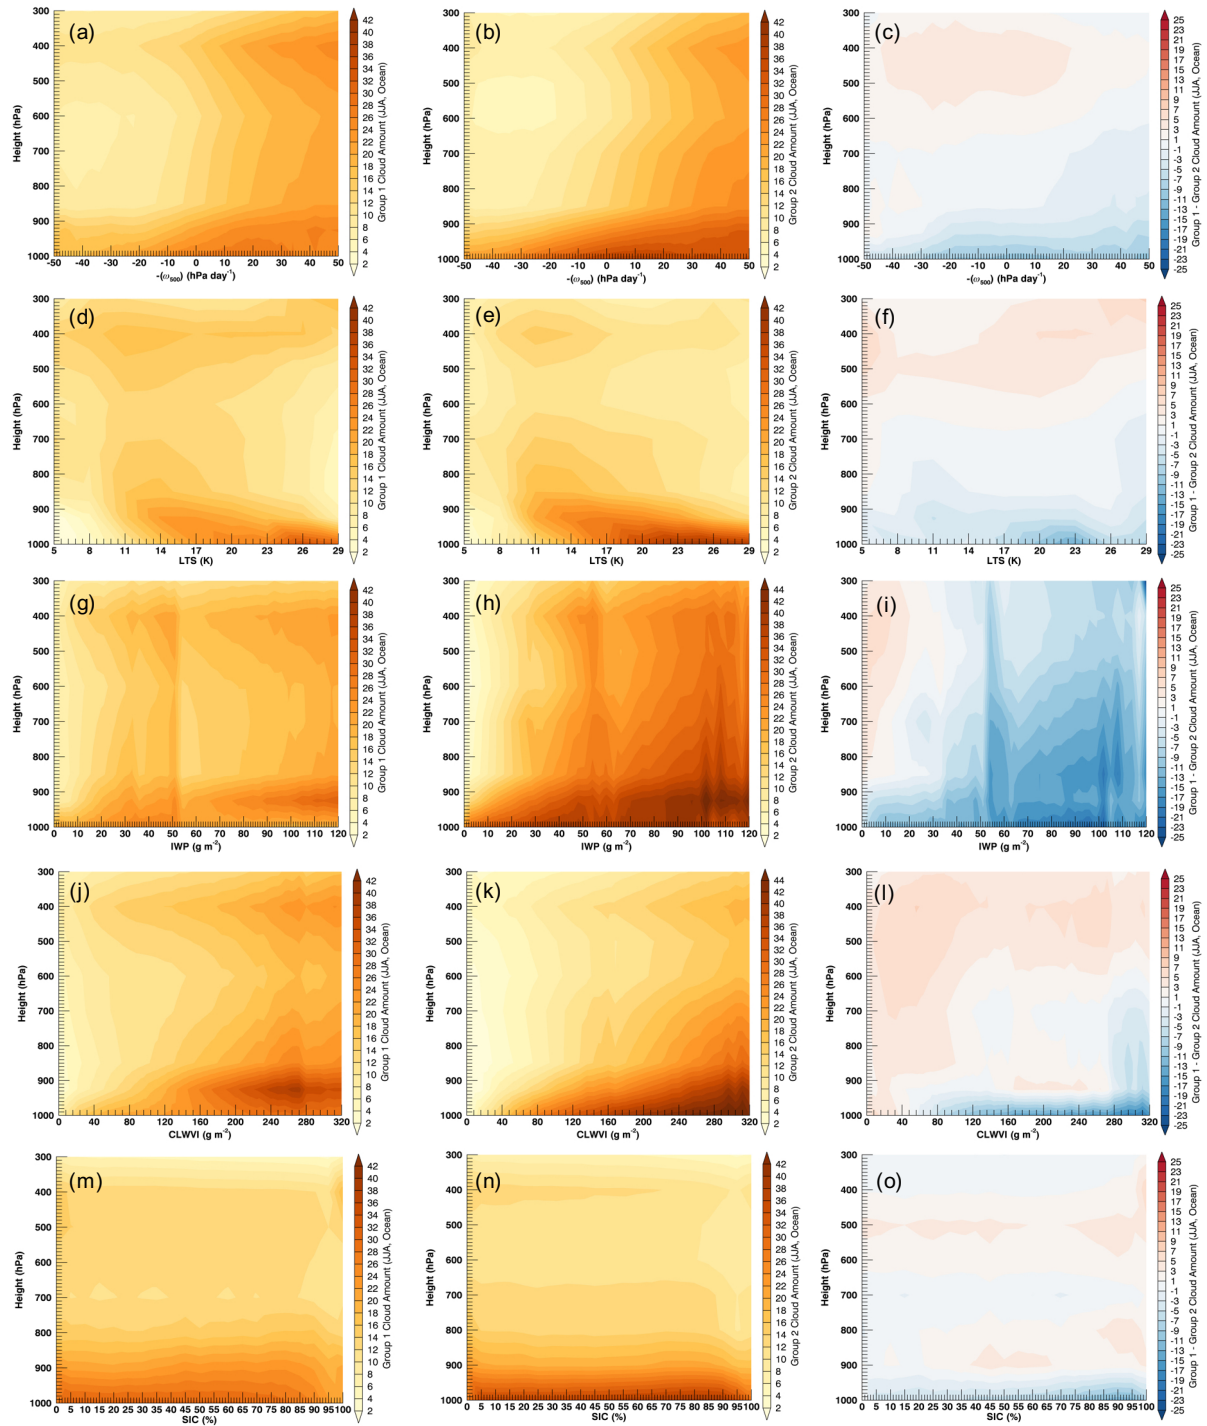

**Figure S2: Vertically-resolved, JJA cloud amount stratified by  $-\omega_{500}$  for (a) Group 1, (b) Group 2, and (c) Group 1 minus Group 2, LTS for (d) Group 1, (e) Group 2, and (f) Group 1 minus Group 2, IWP for (g) Group 1, (h) Group 2, and (i) Group 1 minus Group 2; CLWVI for (j) Group 1, (k) Group 2, and (l) Group 1 minus Group 2, and SIC for (m) Group 1, (n) Group 2, and (o) Group 1 minus Group 2. All panels are for ocean.**

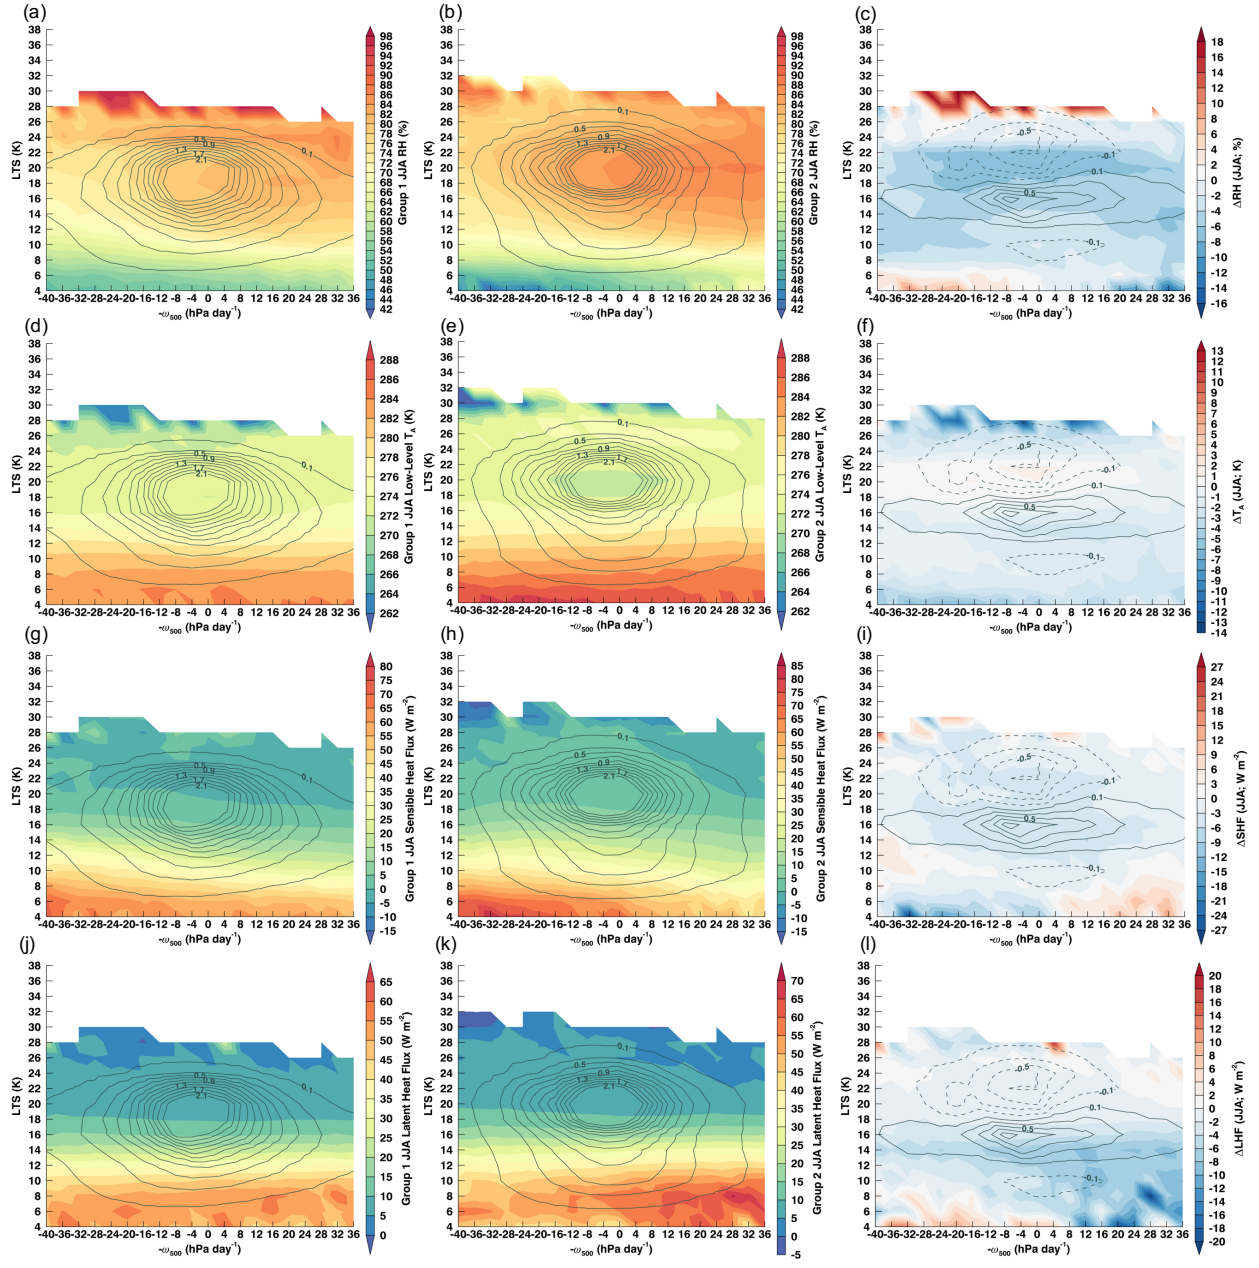

**Figure S3: Contours of JJA atmospheric and surface conditions in the LTS and  $-\omega_{900}$  joint distribution for (left column) Group 1, (middle column) Group 2, and (right column) Group 1 minus Group 2 for (a-c) RH, (d-f) T<sub>L</sub> at 950hPa, (g-l) SHF, and (j-l) LHF.**

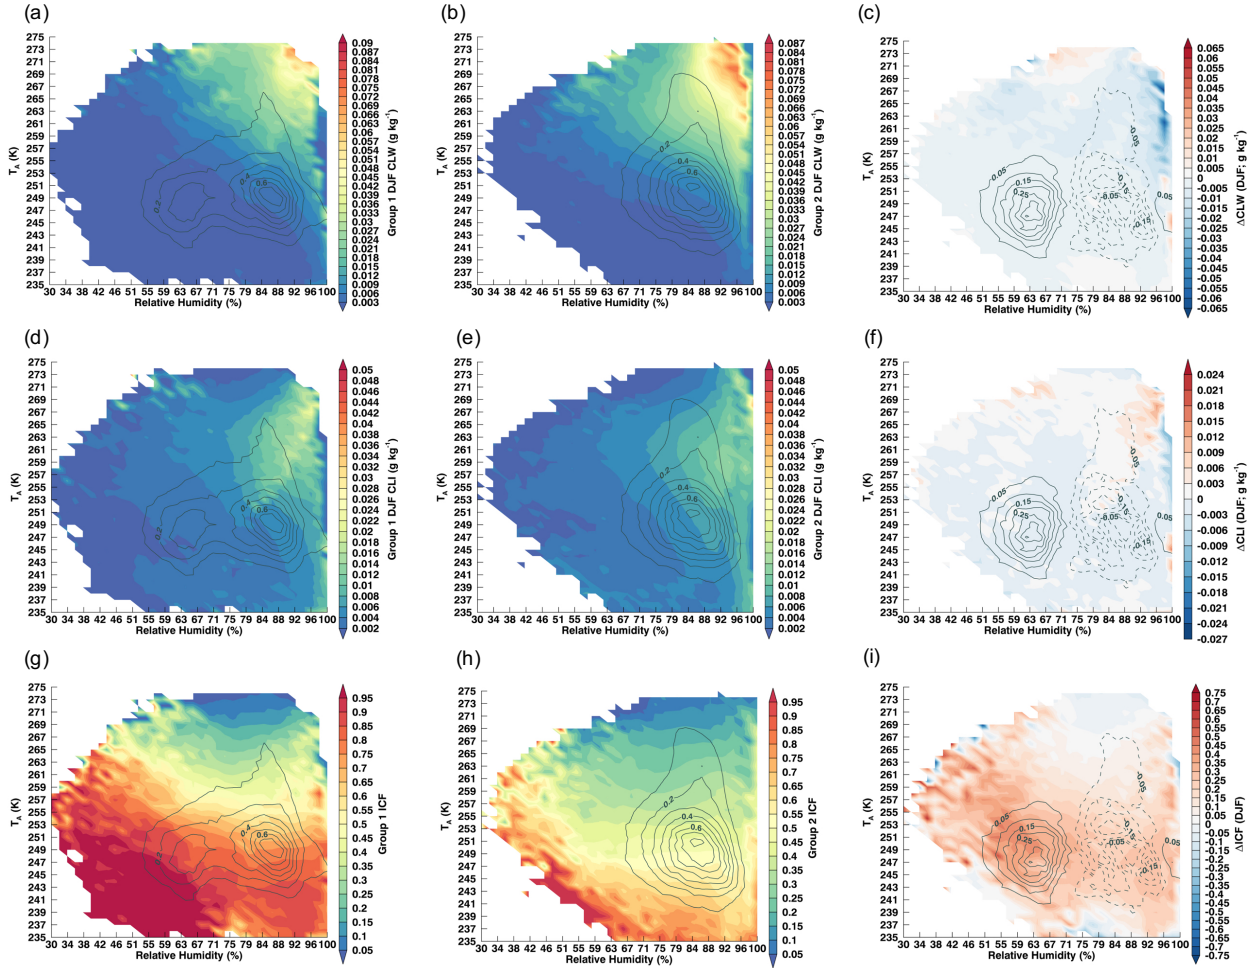

**Figure S4: Contours of winter low cloud CLW for DJF for the  $T_e$ -RH joint distribution for (a) Group 1, (b) Group 2, and (c) Group 1 minus Group 2, CLI (d) Group 1, (e) Group 2, and (f) Group 1 minus Group 2, and ice condensate fraction for (g) Group 1, (h) Group 2, and (i) Group 1 minus Group 2. The frequency of occurrence of  $T_e$ -RH bins is contoured in solid black with an interval of 0.2%.**

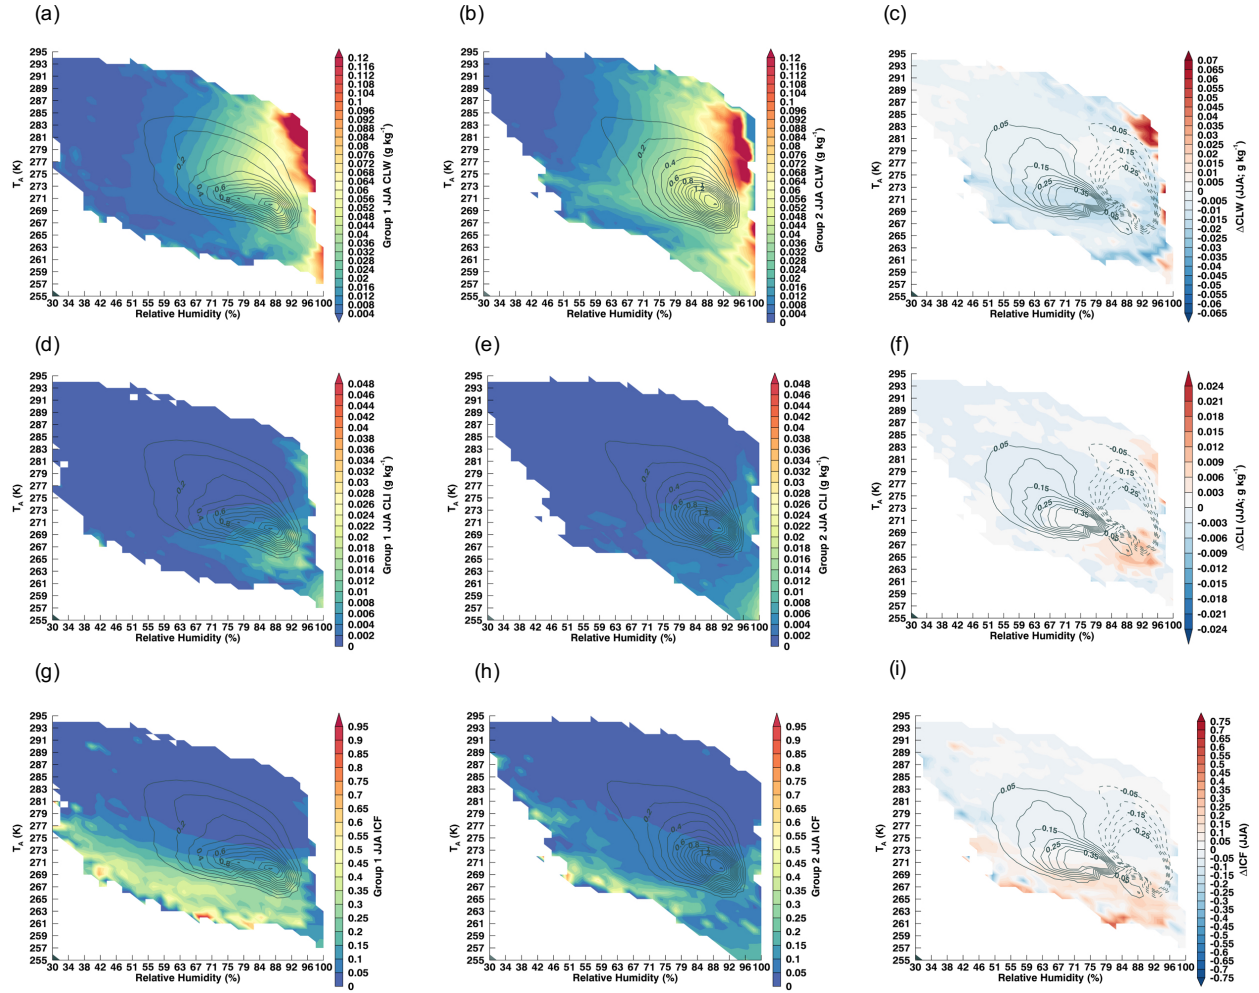

Figure S5: Contours of winter low cloud CLW for JJA for the  $T_r$ -RH joint distribution for (a) Group 1, (b) Group 2, and (c) Group 1 minus Group 2, CLI (d) Group 1, (e) Group 2, and (f) Group 1 minus Group 2, and ice condensate fraction for (g) Group 1, (h) Group 2, and (i) Group 1 minus Group 2. The frequency of occurrence of  $T_r$ -RH bins is contoured in solid black with an interval of 0.2%.
